# Supplementary material
Source: PubMed Central journal article supplement (PMC5540032)

## Supplementary Online Content

Narang AK, Nicholas LH. Out-of-pocket spending and financial burden among Medicare beneficiaries with cancer. *JAMA Oncol*. Published online November 23, 2016. doi:10.1001/jamaoncol.2016.4865

**eAppendix.** Example of HRS Random Entry Bracketing, Components of Household Income and Wealth

**eTable 1.** Distribution of Supplemental Insurance by Wealth and Income in Patients Newly Diagnosed With Cancer

**eTable 2.** Adjusted Out-Of-Pocket Expenditures and Financial Burden in Patients With Cancer, Compared With Patients With Common Noncancer Conditions That Contribute to Mortality in the United States

**eTable 3.** Mean Out-Of-Pocket Expenditures by Service Category, Stratified by Supplemental Insurance Type

**eTable 4.** Decedent Characteristics

**eTable 5.** Adjusted Level Of Out-Of-Pocket Expenditures and Financial Burden in Decedents With Cancer at End of Life, by Type of Supplemental Insurance

**eFigure.** Relative Contribution of Individual OOP Cost Categories to Total OOP Costs for Decedents With Cancer at End of Life, Stratified by Whether Participants' Total OOP Costs Were At or Above the 90th Percentile

This supplementary material has been provided by the authors to give readers additional information about their work.

**eAppendix.** Example of HRS Random Entry Bracketing, Components of Household Income and Wealth

**Example of HRS random entry bracketing:**

As an example, an HRS participant who is unable to report a specific amount of OOP expenditures related to hospital bills may be asked whether the amount was above or below \$1000; if the participant indicates that the amount was below \$1000, the participant is subsequently asked whether the amount was above or below \$500, eventually resulting in a bracketed range.

**Components of household income and wealth:**

Household income includes earnings, capital income, employer pensions and annuities, Social Security retirement benefits, unemployment benefits, worker's compensation, income from the Social Security and Supplemental Security Income disability program, and other government transfers. Household wealth includes the value of primary and secondary residences, real estate, vehicles, businesses, financial instruments (IRA accounts, stocks, bonds, etc), and all other savings, less the amount of mortgage contracts, other home loans, and other debt.

**eTable 1.** Distribution of Supplemental Insurance by Wealth and Income in Patients Newly Diagnosed With Cancer

|                             | <b>Medicaid</b> | <b>VA</b> | <b>HMO</b> | <b>ESI</b> | <b>Medigap</b> | <b>None</b> |
|-----------------------------|-----------------|-----------|------------|------------|----------------|-------------|
| Mean baseline wealth, \$    | 102,113         | 548,520   | 560,623    | 708,543    | 781,702        | 435,312     |
| Baseline wealth quartile, % | 25.9            | 4.1       | 17.2       | 16.0       | 14.8           | 22.1        |
| First                       | 7.5             | 6.6       | 19.7       | 25.1       | 23.1           | 18.0        |
| Second                      | 2.5             | 6.7       | 21.6       | 33.4       | 24.2           | 11.6        |
| Third                       | 1.1             | 6.5       | 19.8       | 35.6       | 26.5           | 10.5        |
| Fourth                      |                 |           |            |            |                |             |
| Mean income, \$             | 20,082          | 71,193    | 52,434     | 77,042     | 64,605         | 44,767      |
| Income quartile, %          |                 |           |            |            |                |             |
| First                       | 26.7            | 2.2       | 17.3       | 11.9       | 19.3           | 22.6        |
| Second                      | 5.7             | 4.8       | 22.4       | 23.3       | 26.6           | 17.3        |
| Third                       | 2.4             | 7.4       | 21.0       | 33.8       | 23.4           | 12.1        |
| Fourth                      | 1.3             | 9.3       | 17.8       | 41.8       | 20.3           | 9.5         |

Abbreviations: VA, Veterans Administration; ESI, employer-sponsored insurance; HMO, health maintenance organization

**eTable 2.** Adjusted Out-Of-Pocket Expenditures and Financial Burden in Patients With Cancer, Compared With Patients With Common Noncancer Conditions That Contribute to Mortality in the United States

|                                       | Mean <sup>a,b</sup> | Median   | 90 <sup>th</sup> |
|---------------------------------------|---------------------|----------|------------------|
| <i>Entire population</i>              |                     |          |                  |
| OOP expenditures, \$                  |                     |          |                  |
| Cancer (ref.)                         | 4,690               | 2,120    | 10,296           |
| Heart disease                         | 4,870               | 2,371*   | 9,747            |
| Dementia                              | 4,427               | 2,063    | 10,376           |
| Stroke                                | 4,995               | 2,280    | 10,464           |
| Diabetes                              | 4,097               | 2,147    | 9,016**          |
| Lung disease                          | 3,970               | 1,961    | 8,993**          |
| None                                  | 3,507***            | 1,694*** | 7,662***         |
| Financial burden, %                   |                     |          |                  |
| Cancer (ref.)                         | 12.7                | 5.7      | 35.7             |
| Heart disease                         | 13.6                | 7.0*     | 36.5             |
| Dementia                              | 13.0                | 5.7      | 37.5             |
| Stroke                                | 13.8                | 6.3      | 38.6             |
| Diabetes                              | 12.4                | 5.9      | 34.2             |
| Lung disease                          | 12.3                | 5.4      | 30.9**           |
| None                                  | 10.7***             | 4.7**    | 29.1***          |
| <i>Medicare HMO</i>                   |                     |          |                  |
| OOP costs, \$                         |                     |          |                  |
| Cancer (ref.)                         | 4,422               | 2,136    | 8,855            |
| Heart disease                         | 3,911               | 2,233    | 9,117            |
| Dementia                              | 3,734               | 2,188    | 9,137            |
| Stroke                                | 4,356               | 2,448    | 10,798*          |
| Diabetes                              | 4,395               | 2,150    | 9,738            |
| Lung disease                          | 3,577               | 1,809    | 7,336            |
| None                                  | 3,228*              | 1,601**  | 6,823*           |
| Financial burden, %                   |                     |          |                  |
| Cancer (ref.)                         | 11.5                | 6.2      | 33.7             |
| Heart disease                         | 12.4                | 6.2      | 35.4             |
| Dementia                              | 11.8                | 5.7      | 31.0             |
| Stroke                                | 13.3                | 7.8*     | 37.8*            |
| Diabetes                              | 12.8                | 6.6      | 33.9             |
| Lung disease                          | 11.4                | 5.8      | 25.7             |
| None                                  | 10.2                | 4.8*     | 25.4*            |
| <i>Private supplemental insurance</i> |                     |          |                  |
| OOP costs, \$                         |                     |          |                  |
| Cancer (ref.)                         | 5,176               | 2,515    | 10,713           |
| Heart disease                         | 5,545               | 2,800    | 10,208           |
| Dementia                              | 4,920               | 2,673    | 10,609           |
| Stroke                                | 6,199               | 2,815    | 10,661           |
| Diabetes                              | 4,380               | 2,500    | 9,586            |
| None                                  | 4,421               | 2,502    | 9,848            |

|                                  |          |          |           |
|----------------------------------|----------|----------|-----------|
| Lung disease                     | 3,970**  | 2,101**  | 8,364***  |
| None                             |          |          |           |
| Financial burden, %              | 12.0     | 5.5      | 31.6      |
| Cancer (ref.)                    | 13.2     | 6.6*     | 31.4      |
| Heart disease                    | 13.8     | 6.9*     | 41.8*     |
| Dementia                         | 14.0     | 7.4***   | 33.0      |
| Stroke                           | 11.9     | 6.2      | 29.9      |
| Diabetes                         | 12.9     | 5.8      | 28.9      |
| Lung disease                     | 10.3*    | 5.1      | 26.0*     |
| None                             |          |          |           |
| <i>No supplemental insurance</i> |          |          |           |
| OOP costs, \$                    |          |          |           |
| Cancer (ref.)                    | 7,260    | 3,420    | 21,557    |
| Heart disease                    | 5,815*   | 3,252    | 13,238*** |
| Dementia                         | 6,461*   | 2,500**  | 16,312**  |
| Stroke                           | 5,165**  | 2,878*   | 12,094*** |
| Diabetes                         | 4,565**  | 2,454**  | 10,015*** |
| Lung disease                     | 3,689*** | 2,220**  | 9,485***  |
| None                             | 3,831*** | 1,802*** | 8,503***  |
| Financial burden, %              |          |          |           |
| Cancer (ref.)                    | 25.8     | 12.5     | 77.1      |
| Heart disease                    | 20.7*    | 11.0     | 60.6*     |
| Dementia                         | 19.1*    | 9.0*     | 57.4*     |
| Stroke                           | 19.8*    | 10.1*    | 57.1*     |
| Diabetes                         | 16.6**   | 8.8*     | 46.1***   |
| Lung disease                     | 15.5**   | 9.1*     | 46.8**    |
| None                             | 15.0***  | 7.1***   | 45.3***   |

<sup>a</sup> \* $P < .05$ , \*\*  $P < .01$ , \*\*\*  $P < .001$

<sup>b</sup> Values represent estimates from multivariable generalized linear regression or quantile regression models. Regression models adjusted for age, sex, race, ethnicity, education, marital status, geographic region, self-assessed health, co-morbidities, smoking status, baseline wealth quartile (only for OOP expenditures), and survey wave.

Abbreviations: OOP, out-of-pocket; ref, reference category for regression analysis; HMO, health maintenance organization

**eTable 3.** Mean Out-Of-Pocket Expenditures by Service Category, Stratified by Supplemental Insurance Type

| Insurance type     | Inpatient hospitalization <sup>a</sup> | Prescription drugs | Dental | Physician/ clinic visits | Outpatient surgery | Home health/ other |
|--------------------|----------------------------------------|--------------------|--------|--------------------------|--------------------|--------------------|
| Medicaid (ref.)    | 242                                    | 58                 | 308    | 446                      | 63                 | 180                |
| VA                 | 355                                    | 130                | 750**  | 246                      | 75                 | 1,632**            |
| Medicare HMO       | 1,024**                                | 657**              | 453    | 364                      | 99                 | 245                |
| Employer-sponsored | 1,050**                                | 452**              | 1203** | 1,004*                   | 399*               | 108                |
| Medigap            | 738**                                  | 581**              | 900**  | 444                      | 216*               | 407                |
| None               | 2,982***                               | 321**              | 859**  | 1,663*                   | 499**              | 42                 |

<sup>a</sup> \* $P < .05$ , \*\*  $P < .01$ , \*\*\*  $P < .001$ , all numerical values represent dollar amounts

Abbreviations: ref, reference category; VA, Veterans' Administration; HMO, health maintenance organization

**eTable 4.** Decedent Characteristics

| <b>Characteristics</b>             | <b>Non-cancer<sup>a,b</sup><br/>(N=4,818)</b> | <b>Cancer<br/>(N=1,489)</b> | <b>P Value</b> |
|------------------------------------|-----------------------------------------------|-----------------------------|----------------|
| Median age, yrs (IQR)              | 83 (77-90)                                    | 79 (73-86)                  | <.001          |
| Female, %                          | 56.8                                          | 47.5                        | <.001          |
| Race, %                            |                                               |                             | .10            |
| Caucasian                          | 82.1                                          | 83.5                        |                |
| Black                              | 14.9                                          | 14.5                        |                |
| Other                              | 3.0                                           | 2.0                         |                |
| Hispanic ethnicity, %              | 7.3                                           | 4.8                         | .001           |
| Education                          |                                               |                             | .005           |
| Less than high school              | 40.1                                          | 35.5                        |                |
| High school grad                   | 32.9                                          | 33.8                        |                |
| Some college                       | 15.5                                          | 16.9                        |                |
| College graduate                   | 11.6                                          | 13.8                        |                |
| Marital status, %                  |                                               |                             | <.001          |
| Married                            | 36.0                                          | 50.7                        |                |
| Separated/divorced                 | 8.9                                           | 9.6                         |                |
| Widowed                            | 51.7                                          | 36.7                        |                |
| Single                             | 3.3                                           | 3.0                         |                |
| Geographic region <sup>b</sup> , % |                                               |                             | .58            |
| New England                        | 6.0                                           | 5.0                         |                |
| Mid-Atlantic                       | 11.3                                          | 11.9                        |                |
| East North Central                 | 16.8                                          | 16.7                        |                |
| West North Central                 | 8.0                                           | 8.3                         |                |
| South Atlantic                     | 26.7                                          | 28.2                        |                |
| East South Central                 | 4.8                                           | 5.3                         |                |
| West South Central                 | 11.3                                          | 11.3                        |                |
| Mountain                           | 4.4                                           | 3.7                         |                |
| Pacific                            | 10.8                                          | 9.5                         |                |
| Co-morbidity                       |                                               |                             |                |
| Hypertension                       | 70.0                                          | 61.5                        | <.001          |
| Diabetes                           | 29.2                                          | 24.5                        | <.001          |
| Lung disease                       | 24.7                                          | 26.3                        | .24            |
| Heart disease                      | 59.3                                          | 43.3                        | <.001          |
| Stroke                             | 31.1                                          | 18.7                        | <.001          |
| Psychiatric                        | 25.5                                          | 18.2                        | <.001          |
| Arthritis                          | 73.6                                          | 68.1                        | <.001          |
| Active smoker                      | 11.9                                          | 19.3                        | <.001          |
| Insurance type                     |                                               |                             | <.001          |
| Medicaid                           | 27.4                                          | 17.1                        |                |
| VA                                 | 4.3                                           | 5.6                         |                |
| Medicare HMO                       | 13.8                                          | 16.9                        |                |
| Employer-sponsored                 | 16.8                                          | 20.8                        |                |
| Medigap                            | 24.4                                          | 27.0                        |                |
| None                               | 13.4                                          | 12.8                        |                |

<sup>a</sup>  $P < .05$ , \*\*  $P < .01$ , \*\*\*  $P < .001$

<sup>b</sup> Geographic regions: New England (ME, NH, VT, MA, RI, CT), Mid-Atlantic (NY, NJ, PA), East North Central (OH, IL, IN, MI, WI), West North Central (MN, IA, MO, ND, SD, NE, KA), South Atlantic (DE, MD, DC, VA, WV, NC, SC, GA, FL), East South Central (KY, TN, AL, MS), West South Central (AR, LA, OK, TK), Mountain (MT, ID, WY, CO, NM, AZ, UT, NV), Pacific (WA, OR, CA, AK, HI)

Abbreviations: IQR, inter-quartile region; VA, Veterans Administration; HMO, health maintenance organization



**eTable 5.** Adjusted Level Of Out-Of-Pocket Expenditures and Financial Burden in Decedents With Cancer at End of Life, by Type of Supplemental Insurance

|                                   | <b>Mean<sup>a,b</sup></b> | <b>Median</b> | <b>90<sup>th</sup></b> |
|-----------------------------------|---------------------------|---------------|------------------------|
| OOP expenditures, \$              |                           |               |                        |
| Medicaid (ref.)                   | 3,669                     | 991           | 13,324                 |
| VA                                | 6,132*                    | 895           | 14,304                 |
| Medicare HMO                      | 7,097**                   | 2,028**       | 15,147                 |
| Employer-sponsored                | 7,109**                   | 1,869*        | 17,215                 |
| Medigap                           | 7,493***                  | 2,205**       | 19,100**               |
| None                              | 8,331***                  | 3,789***      | 21,400***              |
| Financial burden <sup>c</sup> , % |                           |               |                        |
| Medicaid (ref.)                   | 13.5                      | 2.4           | 46.9                   |
| VA                                | 13.7                      | 3.6           | 57.3                   |
| Medicare HMO                      | 18.8*                     | 6.3*          | 59.8                   |
| Employer-sponsored                | 15.6                      | 5.5*          | 57.4                   |
| Medigap                           | 20.4**                    | 6.5**         | 71.9*                  |
| None                              | 28.1***                   | 11.9***       | 73.0*                  |

<sup>a</sup>  $P < .05$ , \*\*  $P < .01$ , \*\*\*  $P < .001$

<sup>b</sup> Values represent estimates from multivariable generalized linear regression or quantile regression models. Regression models adjusted for age, sex, race, ethnicity, education, marital status, geographic region, co-morbidities, smoking status, baseline wealth quartile (OOP expenditures only), and survey wave.

<sup>c</sup> Financial burden = OOP expenditures/total household income

Abbreviations: ref, reference category for regression analysis; VA, Veterans Administration; HMO, health maintenance organization

**eFigure.** Relative Contribution of Individual OOP Cost Categories to Total OOP Costs for Decedents With Cancer at End of Life, Stratified by Whether Participants' Total OOP Costs Were At or Above the 90th Percentile

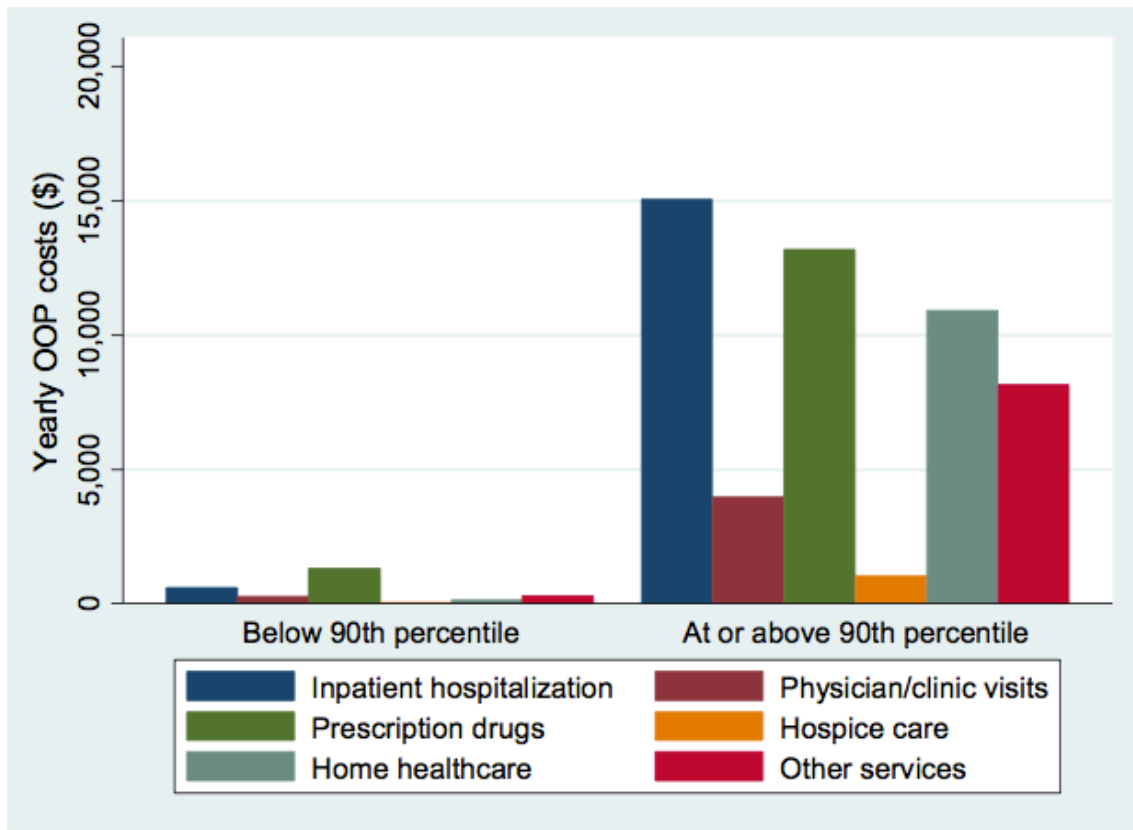

Supplement: jamaoncol-3-757-s001.pdf [file jamaoncol-3-757-s001.pdf]
